# Supplementary material
Source: publisher figshare collection journal article supplement (https://acs.figshare.com/ndownloader/files/5077621)
Supplement: Supplementary file 1 [file 5077621]

## Supporting Information (S1)

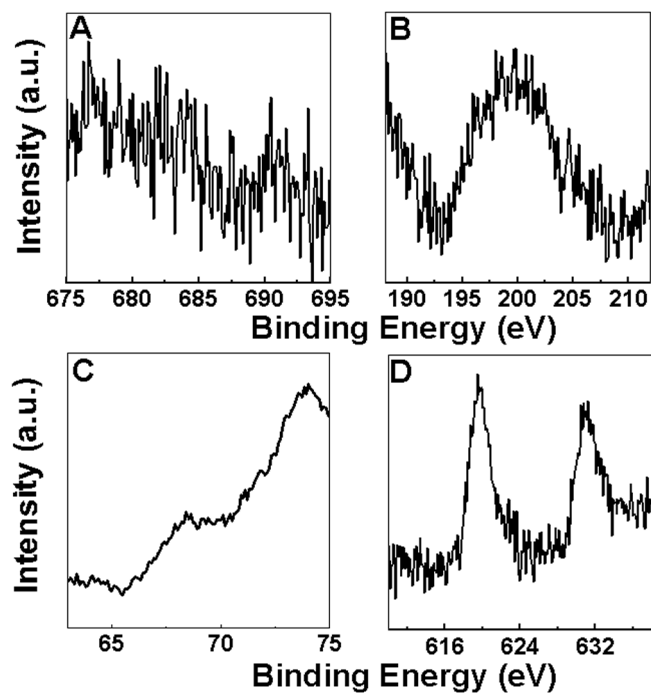

**Figure S1.** XPS halide core level spectra recorded from gold nanotriangles synthesized biologically in the presence of A) KF (F 1s core level), B) KCl (Cl 2p core level), C) KBr (Br 3d core level) and D) KI (I 3d core level). The spectra have not been background corrected.
